# Supplementary material for: A Guide to Conducting a Meta-Analysis with Non-Independent Effect Sizes
Source: PubMed Central journal article supplement (PMC6892772; doi:10.1007/s11065-019-09415-6), 2019-08-24
Supplement: 11065_2019_9415_MOESM1_ESM.pdf [file 11065_2019_9415_MOESM1_ESM.pdf]

# Supplementary Materials for “A Guide to Conducting a Meta-Analysis with Non-Independent Effect Sizes”

Mike W.-L. Cheung

July 09, 2019

## Contents

|                                                                                                                                                                              |           |
|------------------------------------------------------------------------------------------------------------------------------------------------------------------------------|-----------|
| <b>Multivariate meta-analysis with a dataset from Nam, Mengersen, and Garthwaite (2003)</b>                                                                                  | <b>1</b>  |
| Preparation . . . . .                                                                                                                                                        | 1         |
| Univariate meta-analyses . . . . .                                                                                                                                           | 2         |
| Multivariate meta-analysis (assuming $\text{cor}=0.5$ between asthma and LRD) . . . . .                                                                                      | 3         |
| Multivariate meta-analysis (assuming $\text{cor}=0$ between asthma and LRD) . . . . .                                                                                        | 9         |
| Multivariate meta-analysis (assuming $\text{cor}=0.8$ between asthma and LRD) . . . . .                                                                                      | 14        |
| <b>Three-level meta-analysis with a dataset from Stadler et al. (2015)</b>                                                                                                   | <b>20</b> |
| Univariate meta-analysis . . . . .                                                                                                                                           | 20        |
| Three-level meta-analysis . . . . .                                                                                                                                          | 21        |
| <b>Running the analyses in Mplus</b>                                                                                                                                         | <b>23</b> |
| Export the data to Mplus . . . . .                                                                                                                                           | 23        |
| Multivariate meta-analysis . . . . .                                                                                                                                         | 24        |
| Three-level meta-analysis . . . . .                                                                                                                                          | 40        |
| • A latest version of the R and Mplus code is available at <a href="https://github.com/mikewlcheung/code-in-articles">https://github.com/mikewlcheung/code-in-articles</a> . |           |

## Multivariate meta-analysis with a dataset from Nam, Mengersen, and Garthwaite (2003)

### Preparation

```
## Required packages in this paper
lib2install <- c("metaSEM", "metafor")

## Install them automatically if they are not available in your computer
for (i in lib2install) {
  if (!(i %in% rownames(installed.packages()))) install.packages(i)
}

## Load the libraries
library(metaSEM)
library(metafor)

## Display the first few lines of the data
head(Nam03)

##   ID Size Age Year
## 1   3 1285  1.1 1987
```

```

## 2 4 470 9.0 1994
## 3 6 1077 6.7 1995
## 4 8 550 1.7 1995
## 5 10 850 9.4 1996
## 6 11 892 10.9 1996
##
## Country
## 1 English or Scotland
## 2 Scandanavia or Netherlands
## 3 English or Scotland
## 4 Scandanavia or Netherlands
## 5 Other (Israel, Turkey, South Africa, Mexico or U. Arab Emirates
## 6 USA or Canada
##
## Smoke Adj Asthma_logOR LRD_logOR Asthma_v AsthmaLRD_cov_05
## 1 Parental exposure 0 0.38526240 NA 0.0729 NA
## 2 Parental exposure 1 NA 0.03922071 NA NA
## 3 Parental exposure 0 0.35065687 NA 0.0225 NA
## 4 Parental exposure 0 NA 0.60976557 NA NA
## 5 Parental exposure 0 0.24686008 NA 0.0529 NA
## 6 Parental exposure 1 -0.02020271 NA 0.0484 NA
## LRD_v
## 1 NA
## 2 0.0400
## 3 NA
## 4 0.0324
## 5 NA
## 6 NA

```

## Univariate meta-analyses

```

## Univariate meta-analysis on Asthma
summary(meta(y=Asthma_logOR, v=Asthma_v, data=Nam03))

##
## Call:
## meta(y = Asthma_logOR, v = Asthma_v, data = Nam03)
##
## 95% confidence intervals: z statistic approximation (robust=FALSE)
## Coefficients:
## Estimate Std.Error lbound ubound z value Pr(>|z|)
## Intercept1 0.2323694 0.0505369 0.1333190 0.3314199 4.5980 4.265e-06 ***
## Tau2_1_1 0.0403718 0.0198923 0.0013836 0.0793600 2.0295 0.04241 *
## ---
## Signif. codes: 0 '***' 0.001 '**' 0.01 '*' 0.05 '.' 0.1 ' ' 1
##
## Q statistic on the homogeneity of effect sizes: 103.6855
## Degrees of freedom of the Q statistic: 31
## P value of the Q statistic: 9.149564e-10
##
## Heterogeneity indices (based on the estimated Tau2):
## Estimate
## Intercept1: I2 (Q statistic) 0.7297
##
## Number of studies (or clusters): 59

```

```

## Number of observed statistics: 32
## Number of estimated parameters: 2
## Degrees of freedom: 30
## -2 log likelihood: 16.81653
## OpenMx status1: 0 ("0" or "1": The optimization is considered fine.
## Other values may indicate problems.)

## Univariate meta-analysis on LRD
summary(meta(y=LRD_logOR, v=LRD_v, data=Nam03))

##
## Call:
## meta(y = LRD_logOR, v = LRD_v, data = Nam03)
##
## 95% confidence intervals: z statistic approximation (robust=FALSE)
## Coefficients:
##           Estimate   Std.Error   lbound   ubound z value
## Intercept1 0.29576274 0.05688763 0.18426504 0.40726045 5.1991
## Tau2_1_1    0.05081379 0.02612091 -0.00038226 0.10200984 1.9453
##           Pr(>|z|)
## Intercept1 2.003e-07 ***
## Tau2_1_1    0.05174 .
## ---
## Signif. codes:  0 '***' 0.001 '**' 0.01 '*' 0.05 '.' 0.1 ' ' 1
##
## Q statistic on the homogeneity of effect sizes: 164.6626
## Degrees of freedom of the Q statistic: 34
## P value of the Q statistic: 0
##
## Heterogeneity indices (based on the estimated Tau2):
##           Estimate
## Intercept1: I2 (Q statistic) 0.9223
##
## Number of studies (or clusters): 59
## Number of observed statistics: 35
## Number of estimated parameters: 2
## Degrees of freedom: 33
## -2 log likelihood: 34.13923
## OpenMx status1: 0 ("0" or "1": The optimization is considered fine.
## Other values may indicate problems.)

```

## Multivariate meta-analysis (assuming $\text{cor}=0.5$ between asthma and LRD)

### Without any moderator

```

fit0a <- meta(y=cbind(Asthma_logOR, LRD_logOR),
             v=cbind(Asthma_v, AsthmaLRD_cov_05, LRD_v),
             data=Nam03,
             model.name="Multi MA")
summary(fit0a)

##
## Call:
## meta(y = cbind(Asthma_logOR, LRD_logOR), v = cbind(Asthma_v,

```

```

##      AsthmaLRD_cov_05, LRD_v), data = Nam03, model.name = "Multi MA")
##
## 95% confidence intervals: z statistic approximation (robust=FALSE)
## Coefficients:
##           Estimate Std. Error   lbound   ubound z value Pr(>|z|)
## Intercept1 0.2681317 0.0544460 0.1614195 0.3748438 4.9247 8.448e-07 ***
## Intercept2 0.3079815 0.0541262 0.2018960 0.4140670 5.6901 1.270e-08 ***
## Tau2_1_1    0.0684487 0.0296292 0.0103766 0.1265207 2.3102 0.020878 *
## Tau2_2_1    0.0555588 0.0205440 0.0152934 0.0958243 2.7044 0.006843 **
## Tau2_2_2    0.0484633 0.0231445 0.0031009 0.0938257 2.0939 0.036265 *
## ---
## Signif. codes:  0 '***' 0.001 '**' 0.01 '*' 0.05 '.' 0.1 ' ' 1
##
## Q statistic on the homogeneity of effect sizes: 282.7301
## Degrees of freedom of the Q statistic: 65
## P value of the Q statistic: 0
##
## Heterogeneity indices (based on the estimated Tau2):
##                               Estimate
## Intercept1: I2 (Q statistic)  0.8207
## Intercept2: I2 (Q statistic)  0.9188
##
## Number of studies (or clusters): 59
## Number of observed statistics: 67
## Number of estimated parameters: 5
## Degrees of freedom: 62
## -2 log likelihood: 42.55209
## OpenMx status1: 0 ("0" or "1": The optimization is considered fine.
## Other values may indicate problems.)

## Correlation between the population effect sizes
cov2cor(VarCorr(fit0a))

##           [,1]      [,2]
## [1,] 1.0000000 0.9646376
## [2,] 0.9646376 1.0000000

## Plot the (complete) effect sizes and their 95% confidence ellipses
plot(fit0a, xlim=c(-0.5, 1), ylim=c(-0.5, 1), axis.labels=c("Asthma", "LRD"),
     study.ellipse.plot = FALSE, diag.panel=TRUE,
     randeff.ellipse.lty=2,
     main="Log-odds ratio")

forest(rma(yi=Asthma_logOR, vi=Asthma_v, slab=ID, data=Nam03),
       xlab="Log-odds ratio")
title("Forest plot of Asthma")

forest(rma(yi=LRD_logOR, vi=LRD_v, slab=ID, data=Nam03),
       xlab="Log-odds ratio")
title("Forest plot of LRD")

```

## Forest plot of Asthma

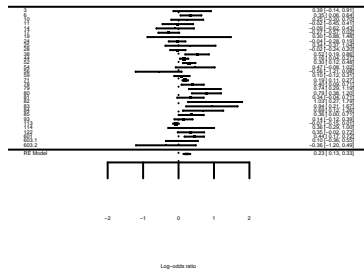

## Log-odds ratio

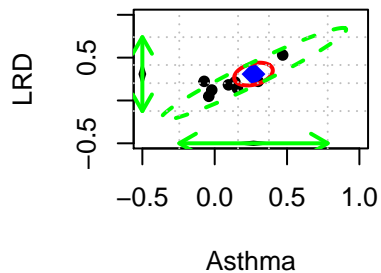

## Forest plot of LRD

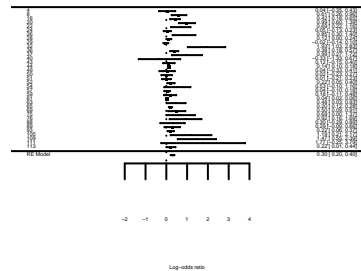

```
## Test whether (1) the population effect sizes and
## (2) heterogeneity variances are the same for Asthma and LRD
fit1a <- meta(y=cbind(Asthma_logOR, LRD_logOR),
             v=cbind(Asthma_v, AsthmaLRD_cov_05, LRD_v),
             data=Nam03,
             intercept.constraints=c("0*Intercept", "0*Intercept"),
             RE.constraints=matrix(c("0.1*Tau2_1_1", "0*Tau2_2_1",
                                    "0*Tau2_2_1", "0.1*Tau2_1_1"),
                                  ncol=2, nrow=2),
             model.name="Equality constraints")
## Compare the models with and without the equality constraints
anova(fit0a, fit1a)
```

```
##      base      comparison ep minus2LL df      AIC  diffLL diffdf
## 1 Multi MA              <NA> 5 42.55209 62 -81.44791      NA      NA
## 2 Multi MA Equality constraints 3 45.32722 64 -82.67278 2.775128      2
##
##      p
## 1      NA
## 2 0.2496827
```

```
summary(fit1a)
```

```
##
## Call:
## meta(y = cbind(Asthma_logOR, LRD_logOR), v = cbind(Asthma_v,
## AsthmaLRD_cov_05, LRD_v), data = Nam03, intercept.constraints = c("0*Intercept",
## "0*Intercept"), RE.constraints = matrix(c("0.1*Tau2_1_1",
```

```

##      "0*Tau2_2_1", "0*Tau2_2_1", "0.1*Tau2_1_1"), ncol = 2, nrow = 2),
##      model.name = "Equality constraints")
##
## 95% confidence intervals: z statistic approximation (robust=FALSE)
## Coefficients:
##           Estimate Std.Error    lbound    ubound z value Pr(>|z|)
## Intercept 0.2927135 0.0429388 0.2085549 0.3768721  6.8170 9.297e-12 ***
## Tau2_1_1  0.0551239 0.0199668 0.0159896 0.0942582  2.7608 0.005766 **
## Tau2_2_1  0.0497245 0.0209576 0.0086484 0.0908005  2.3726 0.017662 *
## ---
## Signif. codes:  0 '***' 0.001 '**' 0.01 '*' 0.05 '.' 0.1 ' ' 1
##
## Q statistic on the homogeneity of effect sizes: 282.7301
## Degrees of freedom of the Q statistic: 65
## P value of the Q statistic: 0
##
## Heterogeneity indices (based on the estimated Tau2):
##                               Estimate
## Intercept1: I2 (Q statistic)  0.7866
## Intercept2: I2 (Q statistic)  0.9279
##
## Number of studies (or clusters): 59
## Number of observed statistics: 67
## Number of estimated parameters: 3
## Degrees of freedom: 64
## -2 log likelihood: 45.32722
## OpenMx status1: 0 ("0" or "1": The optimization is considered fine.
## Other values may indicate problems.)

```

### With the mean Age as a moderator

```

fit2a <- meta(y=cbind(Asthma_logOR, LRD_logOR),
             v=cbind(Asthma_v, AsthmaLRD_cov_05, LRD_v),
             ## Center Age for ease of interpretations
             x=scale(Age, scale=FALSE),
             ## Fix the covariance of between the random effects at 0
             ## as there is not enough data
             RE.constraints=matrix(c("0.1*Tau2_1_1", "0",
                                   "0", "0.1*Tau2_2_2"),
                                   ncol=2, nrow=2),
             data=Nam03,
             model.name="Mixed MA")
summary(fit2a)

##
## Call:
## meta(y = cbind(Asthma_logOR, LRD_logOR), v = cbind(Asthma_v,
##           AsthmaLRD_cov_05, LRD_v), x = scale(Age, scale = FALSE),
##           data = Nam03, RE.constraints = matrix(c("0.1*Tau2_1_1", "0",
##           "0", "0.1*Tau2_2_2"), ncol = 2, nrow = 2), model.name = "Mixed MA")
##
## 95% confidence intervals: z statistic approximation (robust=FALSE)
## Coefficients:

```

```

##           Estimate   Std.Error   lbound   ubound z value
## Intercept1 0.26807390 0.04865798 0.17270602 0.36344178 5.5094
## Intercept2 0.27292919 0.04744385 0.17994095 0.36591742 5.7527
## Slope1_1   -0.03809070 0.01558287 -0.06863257 -0.00754882 -2.4444
## Slope2_1   -0.02366521 0.00935199 -0.04199477 -0.00533565 -2.5305
## Tau2_1_1   0.02831617 0.01439380 0.00010483 0.05652751 1.9672
## Tau2_2_2   0.02970105 0.01560339 -0.00088104 0.06028314 1.9035
##           Pr(>|z|)
## Intercept1 3.602e-08 ***
## Intercept2 8.784e-09 ***
## Slope1_1   0.01451 *
## Slope2_1   0.01139 *
## Tau2_1_1   0.04915 *
## Tau2_2_2   0.05698 .
## ---
## Signif. codes:  0 '***' 0.001 '**' 0.01 '*' 0.05 '.' 0.1 ' ' 1
##
## Q statistic on the homogeneity of effect sizes: 282.7301
## Degrees of freedom of the Q statistic: 65
## P value of the Q statistic: 0
##
## Explained variances (R2):
##                y1    y2
## Tau2 (no predictor) 0.068449 0.0485
## Tau2 (with predictors) 0.028316 0.0297
## R2                0.586315 0.3871
##
## Number of studies (or clusters): 59
## Number of observed statistics: 67
## Number of estimated parameters: 6
## Degrees of freedom: 61
## -2 log likelihood: 38.83728
## OpenMx status1: 0 ("0" or "1": The optimization is considered fine.
## Other values may indicate problems.)

## Test whether the effect of mean Age the same for Asthma and LRD
fit3a <- meta(y=cbind(Asthma_logOR, LRD_logOR),
             v=cbind(Asthma_v, AsthmaLRD_cov_05, LRD_v),
             ## Center Age for ease of interpretations
             x=scale(Age, scale=FALSE),
             ## Fix the covariance of between the random effects at 0
             ## as there is not enough data
             RE.constraints=matrix(c("0.1*Tau2_1_1", "0",
                                    "0", "0.1*Tau2_2_2"),
                                   ncol=2, nrow=2),
             ## Fix the regression coefficients to be identical by
             ## using the same label `Slope1`.
             coef.constraints=matrix(matrix(c("0*Slope1", "0*Slope1"),
                                             nrow=1)),
             data=Nam03,
             model.name="Equality constraints")

## Compare the models with and without the equality constraints
anova(fit2a, fit3a)

```

```
##      base      comparison ep minus2LL df      AIC      diffLL diffdf
## 1 Mixed MA          <NA> 6 38.83728 61 -83.16272      NA      NA
## 2 Mixed MA Equality constraints 5 39.47544 62 -84.52456 0.6381537      1
##      p
## 1      NA
## 2 0.4243802
```

```
summary(fit3a)
```

```
##
## Call:
## meta(y = cbind(Asthma_logOR, LRD_logOR), v = cbind(Asthma_v,
## AsthmaLRD_cov_05, LRD_v), x = scale(Age, scale = FALSE),
## data = Nam03, coef.constraints = matrix(matrix(c("0*Slope1",
## "0*Slope1"), nrow = 1)), RE.constraints = matrix(c("0.1*Tau2_1_1",
## "0", "0", "0.1*Tau2_2_2"), ncol = 2, nrow = 2), model.name = "Equality constraints")
##
## 95% confidence intervals: z statistic approximation (robust=FALSE)
## Coefficients:
##      Estimate      Std.Error      lbound      ubound z value
## Intercept1 0.25595987 0.04598891 0.16582326 0.34609648 5.5657
## Intercept2 0.27564678 0.04748103 0.18258568 0.36870787 5.8054
## Slope1     -0.02760823 0.00826731 -0.04381186 -0.01140460 -3.3394
## Tau2_1_1   0.02808574 0.01465925 -0.00064586 0.05681735 1.9159
## Tau2_2_2   0.03111654 0.01582491 0.00010029 0.06213278 1.9663
##      Pr(>|z|)
## Intercept1 2.611e-08 ***
## Intercept2 6.421e-09 ***
## Slope1     0.0008395 ***
## Tau2_1_1   0.0553771 .
## Tau2_2_2   0.0492638 *
## ---
## Signif. codes:  0 '***' 0.001 '**' 0.01 '*' 0.05 '.' 0.1 ' ' 1
##
## Q statistic on the homogeneity of effect sizes: 282.7301
## Degrees of freedom of the Q statistic: 65
## P value of the Q statistic: 0
##
## Explained variances (R2):
##      y1      y2
## Tau2 (no predictor) 0.068449 0.0485
## Tau2 (with predictors) 0.028086 0.0311
## R2                  0.589682 0.3579
##
## Number of studies (or clusters): 59
## Number of observed statistics: 67
## Number of estimated parameters: 5
## Degrees of freedom: 62
## -2 log likelihood: 39.47544
## OpenMx status1: 0 ("0" or "1": The optimization is considered fine.
## Other values may indicate problems.)
```



## Multivariate meta-analysis (assuming $\text{cor}=0$ between asthma and LRD)

Without any moderator

```
## Create a variable of sampling correlation=0
Nam03$AsthmaLRD_cov_0 <- 0

fit0b <- meta(y=cbind(Asthma_logOR, LRD_logOR),
             v=cbind(Asthma_v, AsthmaLRD_cov_0, LRD_v),
             data=Nam03,
             model.name="Multi MA")
summary(fit0b)

##
## Call:
## meta(y = cbind(Asthma_logOR, LRD_logOR), v = cbind(Asthma_v,
##           AsthmaLRD_cov_0, LRD_v), data = Nam03, model.name = "Multi MA")
##
## 95% confidence intervals: z statistic approximation (robust=FALSE)
## Coefficients:
##           Estimate Std. Error   lbound   ubound z value Pr(>|z|)
## Intercept1 0.2659166 0.0544499 0.1591968 0.3726363  4.8837 1.041e-06 ***
## Intercept2 0.3135788 0.0563451 0.2031444 0.4240132  5.5653 2.617e-08 ***
## Tau2_1_1    0.0635368 0.0279824 0.0086923 0.1183814  2.2706 0.023171 *
## Tau2_2_1    0.0560841 0.0205646 0.0157782 0.0963901  2.7272 0.006387 **
## Tau2_2_2    0.0521575 0.0247765 0.0035964 0.1007185  2.1051 0.035281 *
## ---
## Signif. codes:  0 '***' 0.001 '**' 0.01 '*' 0.05 '.' 0.1 ' ' 1
##
## Q statistic on the homogeneity of effect sizes: 268.3481
## Degrees of freedom of the Q statistic: 65
## P value of the Q statistic: 0
##
## Heterogeneity indices (based on the estimated Tau2):
##           Estimate
## Intercept1: I2 (Q statistic)  0.8095
## Intercept2: I2 (Q statistic)  0.9241
##
## Number of studies (or clusters): 59
## Number of observed statistics: 67
## Number of estimated parameters: 5
## Degrees of freedom: 62
## -2 log likelihood: 44.17176
## OpenMx status1: 0 ("0" or "1": The optimization is considered fine.
## Other values may indicate problems.)

## Correlation between the population effect sizes
cov2cor(VarCorr(fit0b))

##           [,1]      [,2]
## [1,] 1.000000 0.974247
## [2,] 0.974247 1.000000

## Plot the (complete) effect sizes and their 95% confidence ellipses
plot(fit0b, xlim=c(-0.5, 1), ylim=c(-0.5, 1), axis.labels=c("Asthma", "LRD"),
```

```

study.ellipse.plot = FALSE, diag.panel=TRUE,
randeff.ellipse.lty=2,
main="Log-odds ratio (assuming Cor=0)"

```

```

forest(rma(yi=Asthma_logOR, vi=Asthma_v, slab=ID, data=Nam03),
       xlab="Log-odds ratio")

```

```

## Warning in rma(yi = Asthma_logOR, vi = Asthma_v, slab = ID, data = Nam03):
## Studies with NAs omitted from model fitting.

```

```

title("Forest plot of Asthma")

```

```

forest(rma(yi=LRD_logOR, vi=LRD_v, slab=ID, data=Nam03),
       xlab="Log-odds ratio")

```

```

## Warning in rma(yi = LRD_logOR, vi = LRD_v, slab = ID, data = Nam03):
## Studies with NAs omitted from model fitting.

```

```

title("Forest plot of LRD")

```

**Forest plot of Asthma**

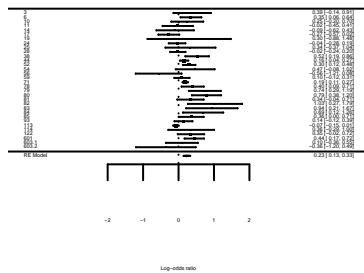

**\_log-odds ratio (assuming Cor=0)**

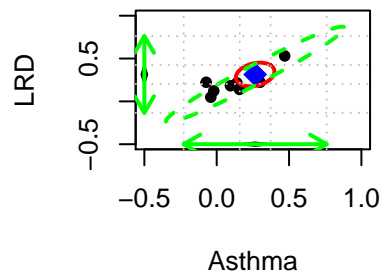

**Forest plot of LRD**

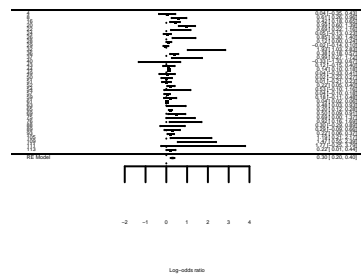

```

## Test whether (1) the population effect sizes and
## (2) heterogeneity variances are the same for Asthma and LRD

```

```

fit1b <- meta(y=cbind(Asthma_logOR, LRD_logOR),
             v=cbind(Asthma_v, AsthmaLRD_cov_0, LRD_v),
             data=Nam03,
             intercept.constraints=c("0*Intercept", "0*Intercept"),
             RE.constraints=matrix(c("0.1*Tau2_1_1", "0*Tau2_2_1",

```

```

                                "0*Tau2_2_1", "0.1*Tau2_1_1"),
                                ncol=2, nrow=2),
                                model.name="Equality constraints")
## Compare the models with and without the equality constraints
anova(fit0b, fit1b)

##           base           comparison ep minus2LL df           AIC   diffLL diffdf
## 1 Multi MA                <NA> 5 44.17176 62 -79.82824      NA      NA
## 2 Multi MA Equality constraints 3 46.29695 64 -81.70305 2.125192      2
##           p
## 1           NA
## 2 0.3455577

summary(fit1b)

##
## Call:
## meta(y = cbind(Asthma_logOR, LRD_logOR), v = cbind(Asthma_v,
##           AsthmaLRD_cov_0, LRD_v), data = Nam03, intercept.constraints = c("0*Intercept",
##           "0*Intercept"), RE.constraints = matrix(c("0.1*Tau2_1_1",
##           "0*Tau2_2_1", "0*Tau2_2_1", "0.1*Tau2_1_1"), ncol = 2, nrow = 2),
##           model.name = "Equality constraints")
##
## 95% confidence intervals: z statistic approximation (robust=FALSE)
## Coefficients:
##           Estimate Std.Error  lbound  ubound z value Pr(>|z|)
## Intercept 0.292847  0.042852 0.208859 0.376835  6.8339 8.262e-12 ***
## Tau2_1_1  0.055253  0.019911 0.016228 0.094279  2.7750 0.005521 **
## Tau2_2_1  0.052059  0.021166 0.010574 0.093544  2.4596 0.013911 *
## ---
## Signif. codes:  0 '***' 0.001 '**' 0.01 '*' 0.05 '.' 0.1 ' ' 1
##
## Q statistic on the homogeneity of effect sizes: 268.3481
## Degrees of freedom of the Q statistic: 65
## P value of the Q statistic: 0
##
## Heterogeneity indices (based on the estimated Tau2):
##           Estimate
## Intercept1: I2 (Q statistic)  0.7870
## Intercept2: I2 (Q statistic)  0.9281
##
## Number of studies (or clusters): 59
## Number of observed statistics: 67
## Number of estimated parameters: 3
## Degrees of freedom: 64
## -2 log likelihood: 46.29695
## OpenMx status1: 0 ("0" or "1": The optimization is considered fine.
## Other values may indicate problems.)

```

### With the mean Age as a moderator

```

fit2b <- meta(y=cbind(Asthma_logOR, LRD_logOR),
              v=cbind(Asthma_v, AsthmaLRD_cov_0, LRD_v),

```

```

## Center Age for ease of interpretations
x=scale(Age, scale=FALSE),
## Fix the covariance of between the random effects at 0
## as there is not enough data
RE.constraints=matrix(c("0.1*Tau2_1_1", "0",
                        "0", "0.1*Tau2_2_2"),
                      ncol=2, nrow=2),

data=Nam03,
model.name="Mixed MA")
summary(fit2b)

```

```

##
## Call:
## meta(y = cbind(Asthma_logOR, LRD_logOR), v = cbind(Asthma_v,
##           AsthmaLRD_cov_0, LRD_v), x = scale(Age, scale = FALSE), data = Nam03,
##           RE.constraints = matrix(c("0.1*Tau2_1_1", "0", "0", "0.1*Tau2_2_2"),
##           ncol = 2, nrow = 2), model.name = "Mixed MA")
##
## 95% confidence intervals: z statistic approximation (robust=FALSE)
## Coefficients:
##           Estimate   Std.Error   lbound   ubound z value
## Intercept1 0.26839859 0.04968285 0.17102199 0.36577520 5.4022
## Intercept2 0.27343978 0.04870472 0.17798029 0.36889927 5.6142
## Slope1_1 -0.03802625 0.01589945 -0.06918861 -0.00686390 -2.3917
## Slope2_1 -0.02375587 0.00956054 -0.04249418 -0.00501756 -2.4848
## Tau2_1_1 0.03037997 0.01525122 0.00048812 0.06027182 1.9920
## Tau2_2_2 0.03189970 0.01675576 -0.00094098 0.06474039 1.9038
##           Pr(>|z|)
## Intercept1 6.581e-08 ***
## Intercept2 1.974e-08 ***
## Slope1_1 0.01677 *
## Slope2_1 0.01296 *
## Tau2_1_1 0.04637 *
## Tau2_2_2 0.05694 .
## ---
## Signif. codes:  0 '***' 0.001 '**' 0.01 '*' 0.05 '.' 0.1 ' ' 1
##
## Q statistic on the homogeneity of effect sizes: 268.3481
## Degrees of freedom of the Q statistic: 65
## P value of the Q statistic: 0
##
## Explained variances (R2):
##           y1   y2
## Tau2 (no predictor) 0.063537 0.0522
## Tau2 (with predictors) 0.030380 0.0319
## R2 0.521853 0.3884
##
## Number of studies (or clusters): 59
## Number of observed statistics: 67
## Number of estimated parameters: 6
## Degrees of freedom: 61
## -2 log likelihood: 39.97773
## OpenMx status1: 0 ("0" or "1": The optimization is considered fine.
## Other values may indicate problems.)

```

```

## Test whether the effect of mean Age the same for Asthma and LRD
fit3b <- meta(y=cbind(Asthma_logOR, LRD_logOR),
             v=cbind(Asthma_v, AsthmaLRD_cov_0, LRD_v),
             ## Center Age for ease of interpretations
             x=scale(Age, scale=FALSE),
             ## Fix the covariance of between the random effects at 0
             ## as there is not enough data
             RE.constraints=matrix(c("0.1*Tau2_1_1", "0",
                                     "0", "0.1*Tau2_2_2"),
                                   ncol=2, nrow=2),
             ## Fix the regression coefficients to be identical by
             ## using the same label `Slope1`.
             coef.constraints=matrix(matrix(c("0*Slope1", "0*Slope1"),
                                             nrow=1)),
             data=Nam03,
             model.name="Equality constraints")

## Compare the models with and without the equality constraints
anova(fit2b, fit3b)

```

```

##      base      comparison ep minus2LL df      AIC  diffLL diffdf
## 1 Mixed MA          <NA>  6 39.97773 61 -82.02227      NA      NA
## 2 Mixed MA Equality constraints  5 40.57193 62 -83.42807 0.594199      1
##      p
## 1      NA
## 2 0.4408

```

```
summary(fit3b)
```

```

##
## Call:
## meta(y = cbind(Asthma_logOR, LRD_logOR), v = cbind(Asthma_v,
## AsthmaLRD_cov_0, LRD_v), x = scale(Age, scale = FALSE), data = Nam03,
## coef.constraints = matrix(matrix(c("0*Slope1", "0*Slope1"),
## nrow = 1)), RE.constraints = matrix(c("0.1*Tau2_1_1",
## "0", "0", "0.1*Tau2_2_2"), ncol = 2, nrow = 2), model.name = "Equality constraints")
##
## 95% confidence intervals: z statistic approximation (robust=FALSE)
## Coefficients:
##      Estimate  Std.Error    lbound    ubound z value
## Intercept1  2.5673e-01  4.7057e-02  1.6450e-01  3.4896e-01  5.4558
## Intercept2  2.7559e-01  4.8693e-02  1.8015e-01  3.7103e-01  5.6597
## Slope1      -2.7675e-02  8.3864e-03 -4.4112e-02 -1.1238e-02 -3.3000
## Tau2_1_1    3.0141e-02  1.5511e-02 -2.5987e-04  6.0542e-02  1.9432
## Tau2_2_2    3.3103e-02  1.6914e-02 -4.7814e-05  6.6255e-02  1.9571
##      Pr(>|z|)
## Intercept1  4.876e-08 ***
## Intercept2  1.517e-08 ***
## Slope1      0.0009668 ***
## Tau2_1_1    0.0519908 .
## Tau2_2_2    0.0503313 .
## ---
## Signif. codes:  0 '***' 0.001 '**' 0.01 '*' 0.05 '.' 0.1 ' ' 1
##

```

```

## Q statistic on the homogeneity of effect sizes: 268.3481
## Degrees of freedom of the Q statistic: 65
## P value of the Q statistic: 0
##
## Explained variances (R2):
##           y1      y2
## Tau2 (no predictor)    0.063537 0.0522
## Tau2 (with predictors) 0.030141 0.0331
## R2                    0.525614 0.3653
##
## Number of studies (or clusters): 59
## Number of observed statistics: 67
## Number of estimated parameters: 5
## Degrees of freedom: 62
## -2 log likelihood: 40.57193
## OpenMx status1: 0 ("0" or "1": The optimization is considered fine.
## Other values may indicate problems.)

```

## Multivariate meta-analysis (assuming $\text{cor}=0.8$ between asthma and LRD)

### Without any moderator

```

## Create a variable of sampling correlation=0
Nam03$AsthmaLRD_cov_08 <- with(Nam03, 0.8*sqrt(Asthma_v)*sqrt(LRD_v))

fit0c <- meta(y=cbind(Asthma_logOR, LRD_logOR),
             v=cbind(Asthma_v, AsthmaLRD_cov_08, LRD_v),
             data=Nam03,
             model.name="Multi MA")
summary(fit0c)

##
## Call:
## meta(y = cbind(Asthma_logOR, LRD_logOR), v = cbind(Asthma_v,
##           AsthmaLRD_cov_08, LRD_v), data = Nam03, model.name = "Multi MA")
##
## 95% confidence intervals: z statistic approximation (robust=FALSE)
## Coefficients:
##           Estimate Std.Error   lbound   ubound z value Pr(>|z|)
## Intercept1 0.271590  0.054237 0.165288 0.377892  5.0075 5.515e-07 ***
## Intercept2 0.300680  0.051778 0.199198 0.402163  5.8071 6.355e-09 ***
## Tau2_1_1    0.073193  0.030757 0.012911 0.133475  2.3798 0.017324 *
## Tau2_2_1    0.055179  0.020340 0.015313 0.095044  2.7128 0.006671 **
## Tau2_2_2    0.044732  0.021433 0.002724 0.086741  2.0871 0.036883 *
## ---
## Signif. codes:  0 '***' 0.001 '**' 0.01 '*' 0.05 '.' 0.1 ' ' 1
##
## Q statistic on the homogeneity of effect sizes: 318.3938
## Degrees of freedom of the Q statistic: 65
## P value of the Q statistic: 0
##
## Heterogeneity indices (based on the estimated Tau2):
##           Estimate

```

```

## Intercept1: I2 (Q statistic) 0.8303
## Intercept2: I2 (Q statistic) 0.9126
##
## Number of studies (or clusters): 59
## Number of observed statistics: 67
## Number of estimated parameters: 5
## Degrees of freedom: 62
## -2 log likelihood: 40.83324
## OpenMx status1: 0 ("0" or "1": The optimization is considered fine.
## Other values may indicate problems.)

## Correlation between the population effect sizes
cov2cor(VarCorr(fitOc))

##          [,1]      [,2]
## [1,] 1.000000 0.964331
## [2,] 0.964331 1.000000

## Plot the (complete) effect sizes and their 95% confidence ellipses
plot(fitOc, xlim=c(-0.5, 1), ylim=c(-0.5, 1), axis.labels=c("Asthma", "LRD"),
     study.ellipse.plot = FALSE, diag.panel=TRUE,
     randeff.ellipse.lty=2,
     main="Log-odds ratio (assuming Cor=0.8)")

forest(rma(yi=Asthma_logOR, vi=Asthma_v, slab=ID, data=Nam03),
       xlab="Log-odds ratio")

## Warning in rma(yi = Asthma_logOR, vi = Asthma_v, slab = ID, data = Nam03):
## Studies with NAs omitted from model fitting.

title("Forest plot of Asthma")

forest(rma(yi=LRD_logOR, vi=LRD_v, slab=ID, data=Nam03),
       xlab="Log-odds ratio")

## Warning in rma(yi = LRD_logOR, vi = LRD_v, slab = ID, data = Nam03):
## Studies with NAs omitted from model fitting.

title("Forest plot of LRD")

```

## Forest plot of Asthma



## log-odds ratio (assuming Co

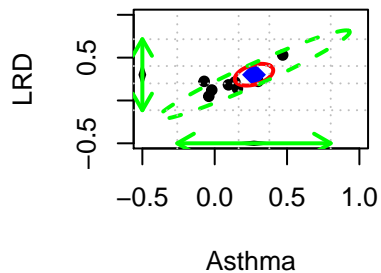

## Forest plot of LRD



```
## Test whether (1) the population effect sizes and
## (2) heterogeneity variances are the same for Asthma and LRD
fit1c <- meta(y=cbind(Asthma_logOR, LRD_logOR),
             v=cbind(Asthma_v, AsthmaLRD_cov_08, LRD_v),
             data=Nam03,
             intercept.constraints=c("0*Intercept", "0*Intercept"),
             RE.constraints=matrix(c("0.1*Tau2_1_1", "0*Tau2_2_1",
                                    "0*Tau2_2_1", "0.1*Tau2_1_1"),
                                  ncol=2, nrow=2),
             model.name="Equality constraints")
## Compare the models with and without the equality constraints
anova(fit0c, fit1c)
```

```
##      base      comparison ep minus2LL df      AIC  diffLL diffdf
## 1 Multi MA          <NA>  5 40.83324 62 -83.16676      NA      NA
## 2 Multi MA Equality constraints  3 44.31864 64 -83.68136  3.485405      2
##
##      p
## 1      NA
## 2 0.1750467
```

```
summary(fit1c)
```

```
##
## Call:
## meta(y = cbind(Asthma_logOR, LRD_logOR), v = cbind(Asthma_v,
## AsthmaLRD_cov_08, LRD_v), data = Nam03, intercept.constraints = c("0*Intercept",
## "0*Intercept"), RE.constraints = matrix(c("0.1*Tau2_1_1",
```



```

##      "0*Tau2_2_1", "0*Tau2_2_1", "0.1*Tau2_1_1"), ncol = 2, nrow = 2),
##      model.name = "Equality constraints")
##
## 95% confidence intervals: z statistic approximation (robust=FALSE)
## Coefficients:
##           Estimate Std.Error    lbound    ubound z value Pr(>|z|)
## Intercept 0.2927176 0.0429686 0.2085008 0.3769344  6.8124 9.601e-12 ***
## Tau2_1_1  0.0550842 0.0199933 0.0158981 0.0942703  2.7551 0.005867 **
## Tau2_2_1  0.0486815 0.0207999 0.0079144 0.0894486  2.3405 0.019260 *
## ---
## Signif. codes:  0 '***' 0.001 '**' 0.01 '*' 0.05 '.' 0.1 ' ' 1
##
## Q statistic on the homogeneity of effect sizes: 318.3938
## Degrees of freedom of the Q statistic: 65
## P value of the Q statistic: 0
##
## Heterogeneity indices (based on the estimated Tau2):
##                               Estimate
## Intercept1: I2 (Q statistic)  0.7865
## Intercept2: I2 (Q statistic)  0.9279
##
## Number of studies (or clusters): 59
## Number of observed statistics: 67
## Number of estimated parameters: 3
## Degrees of freedom: 64
## -2 log likelihood: 44.31864
## OpenMx status1: 0 ("0" or "1": The optimization is considered fine.
## Other values may indicate problems.)

```

### With the mean Age as a moderator

```

fit2c <- meta(y=cbind(Asthma_logOR, LRD_logOR),
             v=cbind(Asthma_v, AsthmaLRD_cov_08, LRD_v),
             ## Center Age for ease of interpretations
             x=scale(Age, scale=FALSE),
             ## Fix the covariance of between the random effects at 0
             ## as there is not enough data
             RE.constraints=matrix(c("0.1*Tau2_1_1", "0",
                                     "0", "0.1*Tau2_2_2"),
                                   ncol=2, nrow=2),
             data=Nam03,
             model.name="Mixed MA")
summary(fit2c)

##
## Call:
## meta(y = cbind(Asthma_logOR, LRD_logOR), v = cbind(Asthma_v,
##           AsthmaLRD_cov_08, LRD_v), x = scale(Age, scale = FALSE),
##           data = Nam03, RE.constraints = matrix(c("0.1*Tau2_1_1", "0",
##           "0", "0.1*Tau2_2_2"), ncol = 2, nrow = 2), model.name = "Mixed MA")
##
## 95% confidence intervals: z statistic approximation (robust=FALSE)
## Coefficients:

```

```

##           Estimate  Std.Error    lbound    ubound z value
## Intercept1 2.6742e-01 4.7779e-02 1.7378e-01 3.6107e-01 5.5970
## Intercept2 2.7264e-01 4.6412e-02 1.8168e-01 3.6361e-01 5.8744
## Slope1_1   -3.8071e-02 1.5347e-02 -6.8151e-02 -7.9907e-03 -2.4806
## Slope2_1   -2.3580e-02 9.2084e-03 -4.1628e-02 -5.5316e-03 -2.5607
## Tau2_1_1   2.6934e-02 1.3733e-02 1.7209e-05 5.3850e-02 1.9612
## Tau2_2_2   2.8248e-02 1.4782e-02 -7.2416e-04 5.7220e-02 1.9110
##           Pr(>|z|)
## Intercept1 2.181e-08 ***
## Intercept2 4.243e-09 ***
## Slope1_1   0.01312 *
## Slope2_1   0.01045 *
## Tau2_1_1   0.04985 *
## Tau2_2_2   0.05601 .
## ---
## Signif. codes:  0 '***' 0.001 '**' 0.01 '*' 0.05 '.' 0.1 ' ' 1
##
## Q statistic on the homogeneity of effect sizes: 318.3938
## Degrees of freedom of the Q statistic: 65
## P value of the Q statistic: 0
##
## Explained variances (R2):
##                y1    y2
## Tau2 (no predictor) 0.073193 0.0447
## Tau2 (with predictors) 0.026934 0.0282
## R2                0.632020 0.3685
##
## Number of studies (or clusters): 59
## Number of observed statistics: 67
## Number of estimated parameters: 6
## Degrees of freedom: 61
## -2 log likelihood: 37.96009
## OpenMx status1: 0 ("0" or "1": The optimization is considered fine.
## Other values may indicate problems.)

## Test whether the effect of mean Age the same for Asthma and LRD
fit3c <- meta(y=cbind(Asthma_logOR, LRD_logOR),
             v=cbind(Asthma_v, AsthmaLRD_cov_08, LRD_v),
             ## Center Age for ease of interpretations
             x=scale(Age, scale=FALSE),
             ## Fix the covariance of between the random effects at 0
             ## as there is not enough data
             RE.constraints=matrix(c("0.1*Tau2_1_1", "0",
                                    "0", "0.1*Tau2_2_2"),
                                   ncol=2, nrow=2),
             ## Fix the regression coefficients to be identical by
             ## using the same label `Slope1`.
             coef.constraints=matrix(matrix(c("0*Slope1", "0*Slope1"),
                                             nrow=1)),
             data=Nam03,
             model.name="Equality constraints")

## Compare the models with and without the equality constraints
anova(fit2c, fit3c)

```

```
##      base      comparison ep minus2LL df      AIC      diffLL diffdf
## 1 Mixed MA          <NA> 6 37.96009 61 -84.03991      NA      NA
## 2 Mixed MA Equality constraints 5 38.62837 62 -85.37163 0.6682878      1
##      p
## 1      NA
## 2 0.4136492
```

```
summary(fit3c)
```

```
##
## Call:
## meta(y = cbind(Asthma_logOR, LRD_logOR), v = cbind(Asthma_v,
## AsthmaLRD_cov_08, LRD_v), x = scale(Age, scale = FALSE),
## data = Nam03, coef.constraints = matrix(matrix(c("0*Slope1",
## "0*Slope1"), nrow = 1)), RE.constraints = matrix(c("0.1*Tau2_1_1",
## "0", "0", "0.1*Tau2_2_2"), ncol = 2, nrow = 2), model.name = "Equality constraints")
##
## 95% confidence intervals: z statistic approximation (robust=FALSE)
## Coefficients:
##      Estimate      Std.Error      lbound      ubound z value
## Intercept1 0.25511009 0.04511419 0.16668790 0.34353228 5.6548
## Intercept2 0.27567384 0.04648069 0.18457336 0.36677432 5.9309
## Slope1     -0.02753187 0.00818095 -0.04356623 -0.01149750 -3.3654
## Tau2_1_1   0.02670746 0.01399698 -0.00072612 0.05414104 1.9081
## Tau2_2_2   0.02976481 0.01503751 0.00029183 0.05923779 1.9794
##      Pr(>|z|)
## Intercept1 1.561e-08 ***
## Intercept2 3.012e-09 ***
## Slope1     0.0007644 ***
## Tau2_1_1   0.0563800 .
## Tau2_2_2   0.0477743 *
## ---
## Signif. codes:  0 '***' 0.001 '**' 0.01 '*' 0.05 '.' 0.1 ' ' 1
##
## Q statistic on the homogeneity of effect sizes: 318.3938
## Degrees of freedom of the Q statistic: 65
## P value of the Q statistic: 0
##
## Explained variances (R2):
##      y1      y2
## Tau2 (no predictor) 0.073193 0.0447
## Tau2 (with predictors) 0.026707 0.0298
## R2                   0.635109 0.3346
##
## Number of studies (or clusters): 59
## Number of observed statistics: 67
## Number of estimated parameters: 5
## Degrees of freedom: 62
## -2 log likelihood: 38.62837
## OpenMx status1: 0 ("0" or "1": The optimization is considered fine.
## Other values may indicate problems.)
```

# Three-level meta-analysis with a dataset from Stadler et al. (2015)

## Univariate meta-analysis

```
## Show the first few cases
head(Stadler15)
```

```
##   ID           Authors Year   N CPSMeasure IntelligenceMeasure   r
## 1  1     Abele et al. (2012) 2012 167      MCS           Reasoning 0.40
## 2  2 Beckman & Guthke (1995) 1995  92 Classical General intelligence 0.15
## 3  3     Buhner et al. (2008) 2008 144      SCS           Reasoning 0.16
## 4  4 Burkolter et al. (2009) 2009  41 Classical General intelligence 0.75
## 5  5 Burkolter et al. (2010) 2010  39 Classical General intelligence 0.22
## 6  6     Burmeister (2009) 2009  44 Classical General intelligence 0.47
##
##           v
## 1 0.004250602
## 2 0.010500069
## 3 0.006639548
## 4 0.004785156
## 5 0.023830067
## 6 0.014116205
```

```
summary(meta(y=r, v=v, data=Stadler15))
```

```
##
## Call:
## meta(y = r, v = v, data = Stadler15)
##
## 95% confidence intervals: z statistic approximation (robust=FALSE)
## Coefficients:
##           Estimate Std. Error   lbound   ubound z value Pr(>|z|)
## Intercept1 0.4209997 0.0304717 0.3612762 0.4807232 13.8161 < 2.2e-16 ***
## Tau2_1_1   0.0423946 0.0097469 0.0232911 0.0614982  4.3496 1.364e-05 ***
## ---
## Signif. codes:  0 '***' 0.001 '**' 0.01 '*' 0.05 '.' 0.1 ' ' 1
##
## Q statistic on the homogeneity of effect sizes: 1155.141
## Degrees of freedom of the Q statistic: 59
## P value of the Q statistic: 0
##
## Heterogeneity indices (based on the estimated Tau2):
##                               Estimate
## Intercept1: I2 (Q statistic)  0.9624
##
## Number of studies (or clusters): 60
## Number of observed statistics: 60
## Number of estimated parameters: 2
## Degrees of freedom: 58
## -2 log likelihood: -2.06745
## OpenMx status1: 0 ("0" or "1": The optimization is considered fine.
## Other values may indicate problems.)
```

## Three-level meta-analysis

Without any moderator

```
## Display the number of effect sizes per study  
table(Stadler15$Authors)
```

```
##  
##           Abele et al. (2012)           Beckman & Guthke (1995)  
##                                     1                                     1  
##           Buhner et al. (2008)           Burkolter et al. (2009)  
##                                     1                                     1  
##           Burkolter et al. (2010)           Burmeister (2009)  
##                                     1                                     1  
##           Danner (2011)           Dorner et al. (1983)  
##                                     1                                     2  
##           Gediga et al. (1984)           Gonzales et al. (2005)  
##                                     1                                     3  
##           Greiff & Fischer (2013)           Greiff et al. (2015)  
##                                     1                                     2  
##           Guss & Dorner (2011)           Hasselmann (1993)  
##                                     1                                     1  
##           Hesse (1982)           Hormann & Thomas (1989)  
##                                     4                                     2  
##           Hussy (1985)           Hussy (1989)  
##                                     4                                     1  
##           Kersting (2001)           Klieme et al. (2001)  
##                                     1                                     1  
##           Kluge et al. (2011)           Kretzschmar (2010)  
##                                     1                                     1  
## Kretzschmar et al. (Unpublished)           Kroner (2001)  
##                                     1                                     1  
##           Kroner et al. (2005)           Leutner (2002)  
##                                     1                                     2  
##           Leutner et al. (2004)           Leutner et al. (2005)  
##                                     1                                     1  
##           Neubert et al. (2014)           Putz-Osterloh (1985)  
##                                     1                                     1  
##           Rigas et al. (2002)           Scherer & Tiemann a (2014)  
##                                     1                                     1  
##           Scherer & Tiemann b (2014)           Sonnleitner et al. (2012)  
##                                     1                                     1  
##           Stadler et al. (In press)           Stadler et al. (Unpublished)  
##                                     1                                     2  
##           Sub et al. (1991)           Sub et al. (1993)  
##                                     1                                     1  
##           Wagener (2001)           Wagener & Wittmann (2002)  
##                                     4                                     1  
##           Wirth & Funke (2005)           Wittmann et al. (1996)  
##                                     1                                     1  
##           Wustenberg et al. (2012)           Wustenberg et al. (2014)  
##                                     1                                     1
```

```

fit4 <- meta3(y=r, v=v, cluster=Authors, data=Stadler15)
summary(fit4)

##
## Call:
## meta3(y = r, v = v, cluster = Authors, data = Stadler15)
##
## 95% confidence intervals: z statistic approximation (robust=FALSE)
## Coefficients:
##           Estimate Std.Error      lbound      ubound z value Pr(>|z|)
## Intercept  0.4348248  0.0323879  0.3713457  0.4983039 13.4255 < 2e-16 ***
## Tau2_2     0.0191179  0.0110196 -0.0024801  0.0407160  1.7349  0.08276 .
## Tau2_3     0.0214491  0.0117158 -0.0015134  0.0444116  1.8308  0.06713 .
## ---
## Signif. codes:  0 '***' 0.001 '**' 0.01 '*' 0.05 '.' 0.1 ' ' 1
##
## Q statistic on the homogeneity of effect sizes: 1155.141
## Degrees of freedom of the Q statistic: 59
## P value of the Q statistic: 0
##
## Heterogeneity indices (based on the estimated Tau2):
##                               Estimate
## I2_2 (Typical v: Q statistic)  0.4528
## I2_3 (Typical v: Q statistic)  0.5080
##
## Number of studies (or clusters): 44
## Number of observed statistics: 60
## Number of estimated parameters: 3
## Degrees of freedom: 57
## -2 log likelihood: -5.44511
## OpenMx status1: 0 ("0" or "1": The optimization is considered fine.
## Other values may indicate problems.)

```

### With the IntelligenceMeasure as a moderator

```

## Display the number of effect sizes per outcome measure
table(Stadler15$IntelligenceMeasure)

##
## General intelligence      Reasoning
##           21                39

fit5 <- meta3(y=r, v=v, cluster=Authors, data=Stadler15,
              intercept.constraints=0,
              x=model.matrix(~ -1+IntelligenceMeasure))

## Compare the models with and without the equality constraint
anova(fit5, fit4)

##           base           comparison ep  minus2LL df      AIC
## 1 Meta analysis with ML           <NA>  4 -9.962584 56 -121.9626
## 2 Meta analysis with ML Meta analysis with ML  3 -5.445110 57 -119.4451
##   diffLL diffdf           p
## 1      NA     NA         NA

```

```

## 2 4.517474      1 0.03355032
## Slope_1: General intelligence
## Slope_2: Reasoning
summary(fit5)

##
## Call:
## meta3(y = r, v = v, cluster = Authors, x = model.matrix(~-1 +
## IntelligenceMeasure), data = Stadler15, intercept.constraints = 0)
##
## 95% confidence intervals: z statistic approximation (robust=FALSE)
## Coefficients:
##           Estimate  Std.Error    lbound    ubound z value Pr(>|z|)
## Slope_1  0.35088633  0.05009279  0.25270627  0.44906639  7.0047 2.475e-12
## Slope_2  0.48409148  0.03778644  0.41003142  0.55815154 12.8112 < 2.2e-16
## Tau2_2   0.01752965  0.00952992 -0.00114866  0.03620796  1.8394  0.06585
## Tau2_3   0.01868845  0.00996217 -0.00083704  0.03821395  1.8759  0.06066
##
## Slope_1 ***
## Slope_2 ***
## Tau2_2 .
## Tau2_3 .
## ---
## Signif. codes:  0 '***' 0.001 '**' 0.01 '*' 0.05 '.' 0.1 ' ' 1
##
## Q statistic on the homogeneity of effect sizes: 1155.141
## Degrees of freedom of the Q statistic: 59
## P value of the Q statistic: 0
##
## Explained variances (R2):
##           Level 2 Level 3
## Tau2 (no predictor)  0.019118  0.0214
## Tau2 (with predictors) 0.017530  0.0187
## R2                   0.083077  0.1287
##
## Number of studies (or clusters): 44
## Number of observed statistics: 60
## Number of estimated parameters: 4
## Degrees of freedom: 56
## -2 log likelihood: -9.962584
## OpenMx status1: 0 ("0" or "1": The optimization is considered fine.
## Other values may indicate problems.)

```

## Running the analyses in Mplus

### Export the data to Mplus

- Multivariate meta-analysis

```

## Get a copy of the known sampling variances and covariance
my.v <- Nam03[, c("Asthma_v", "AsthmaLRD_cov_05", "LRD_v")]

```

```

## Replace the missing value with 0.
## Since data with missing effect sizes are automatically filtered,
## the imputed value of 0 does not affect the analysis.
my.v[is.na(my.v)] <- 0

## Combine the effect sizes with the known sampling variances and covariance.
my.df <- cbind(Nam03[, c("ID", "Age", "Asthma_logOR", "LRD_logOR")], my.v)

## Display the few cases
head(my.df)

## Write it as a data file
write.table(my.df, "Nam03.dat", na = ".", row.names = FALSE, col.names = FALSE)

```

- Three-level meta-analysis

```

## Get unique numeric labels for the level 3 (study)
## as Mplus only allows numeric data
Study_ID <- with(Stadler15, as.numeric(factor(Authors, level=unique(Authors))))

## Create dummy codes for the Intelligence Measure
GenInt <- ifelse(Stadler15$IntelligenceMeasure=="General intelligence", yes=1, no=0)
Reason <- ifelse(Stadler15$IntelligenceMeasure=="Reasoning", yes=1, no=0)

my.df <- cbind(ID=Stadler15$ID, Study_ID,
               Stadler15[, c("r", "v")], GenInt, Reason)

## Display the few cases
head(my.df, n=8)

## Write it as a data file
write.table(my.df, "Stadler15.dat", na = ".", row.names = FALSE, col.names = FALSE)

```

## Multivariate meta-analysis

```

# [Multivariate random-effects meta-analysis](./Nam03a.inp)
# ```
#
# TITLE:    Multivariate random-effects meta-analysis
#
# ! Read the dataset
# DATA: FILE IS Nam03.dat;
#
# ! Variable names in the data
# ! Asthma LRD: effect sizes
# ! Asthma_v Cov_05 LRD_v: known sampling variances and covariance
# VARIABLE: NAMES ID Age Asthma LRD Asthma_v Cov_05 LRD_v;
#
#           ! Missing values are represented by .
#           MISSING ARE .;
#
#           ! Asthma and LRD are used in the analysis.
#           USEVARIABLES ARE Asthma LRD;

```



```

#
#       ! These are the known sampling variances and covariance.
#       CONSTRAINT ARE Asthma_v Cov_05 LRD_v;
#
# MODEL:
#       ! Define two latent variables
#       Lat_Ast BY Asthma;
#       Lat_LRD BY LRD;
#
#       ! Estimate their means
#       [Lat_Ast*];
#       [Lat_LRD*];
#
#       ! Means of the observed variables are fixed at 0.
#       [Asthma@0];
#       [LRD@0];
#
#       ! Label the constraints for the known sampling variances
#       ! and covariances
#       Asthma (L1);
#       LRD (L2);
#       Asthma WITH LRD (L3);
#
#       ! Impose the constraints
#       MODEL CONSTRAINT:
#       L1 = Asthma_v;
#       L2 = LRD_v;
#       L3 = Cov_05;
#
#
#
# [Mplus output file](./Nam03a.out)
#
#
# Mplus VERSION 8.2 (Linux)
# MUTHEN & MUTHEN
# 02/06/2019   6:31 PM
#
# INPUT INSTRUCTIONS
#
# TITLE:  Multivariate random-effects meta-analysis
#
# ! Read the dataset
# DATA:  FILE IS Nam03.dat;
#
# ! Variable names in the data
# ! Asthma LRD: effect sizes
# ! Asthma_v Cov_05 LRD_v: known sampling variances and covariance
# VARIABLE: NAMES ID Age Asthma LRD Asthma_v Cov_05 LRD_v;
#
#       ! Missing values are represented by .
#       MISSING ARE .;
#
#       ! Asthma and LRD are used in the analysis.

```

```

#           USEVARIABLES ARE Asthma LRD;
#
#           ! These are the known sampling variances and covariance.
#           CONSTRAINT ARE Asthma_v Cov_05 LRD_v;
#
# MODEL:
#           ! Define two latent variables
#           Lat_Ast BY Asthma;
#           Lat_LRD BY LRD;
#
#           ! Estimate their means
#           [Lat_Ast*];
#           [Lat_LRD*];
#
#           ! Means of the observed variables are fixed at 0.
#           [Asthma@0];
#           [LRD@0];
#
#           ! Label the constraints for the known sampling variances
#           ! and covariances
#           Asthma (L1);
#           LRD (L2);
#           Asthma WITH LRD (L3);
#
#           ! Impose the constraints
#           MODEL CONSTRAINT:
#           L1 = Asthma_v;
#           L2 = LRD_v;
#           L3 = Cov_05;
#
#
# INPUT READING TERMINATED NORMALLY
#
#
# Multivariate random-effects meta-analysis
#
# SUMMARY OF ANALYSIS
#
# Number of groups                                1
# Number of observations                          59
#
# Number of dependent variables                   2
# Number of independent variables                 0
# Number of continuous latent variables          2
#
# Observed dependent variables
#
# Continuous
#   ASTHMA      LRD
#
# Continuous latent variables
#   LAT_AST     LAT_LRD

```

```

#
#
# Estimator ML
# Information matrix OBSERVED
# Maximum number of iterations 1000
# Convergence criterion 0.500D-04
# Maximum number of steepest descent iterations 20
# Maximum number of iterations for H1 2000
# Convergence criterion for H1 0.100D-03
#
# Input data file(s)
# Nam03.dat
#
# Input data format FREE
#
# SUMMARY OF DATA
#
# Number of missing data patterns 3
#
# COVARIANCE COVERAGE OF DATA
#
# Minimum covariance coverage value 0.100
#
# PROPORTION OF DATA PRESENT
#
# Covariance Coverage
# ASTHMA LRD
# -----
# ASTHMA 0.542
# LRD 0.136 0.593
#
# UNIVARIATE SAMPLE STATISTICS
#
# UNIVARIATE HIGHER-ORDER MOMENT DESCRIPTIVE STATISTICS
#
# Variable/ Mean/ Skewness/ Minimum/ % with Percentiles
# Sample Size Variance Kurtosis Maximum Min/Max 20%/60% 40%/80% Median
#
# ASTHMA 0.268 -0.038 -0.562 3.12% -0.041 0.191 0.318
# 32.000 0.122 0.110 1.030 3.12% 0.351 0.470
# LRD 0.466 1.209 -0.329 2.86% 0.039 0.199 0.285
# 35.000 0.267 0.929 1.933 2.86% 0.419 0.850
# ASTHMA_V 0.034 3.079 0.000 45.76% 0.000 0.000 0.004
# 59.000 0.004 11.930 0.360 1.69% 0.017 0.053
# COV_05 0.001 6.762 0.000 86.44% 0.000 0.000 0.000
# 59.000 0.000 46.498 0.045 1.69% 0.000 0.000
# LRD_V 0.054 5.551 0.000 40.68% 0.000 0.000 0.005

```

# 59.000 0.022 34.387 1.061 1.69% 0.012 0.053

# THE MODEL ESTIMATION TERMINATED NORMALLY

# MODEL FIT INFORMATION

# Number of Free Parameters 5

# Loglikelihood

# H0 Value -21.276

# Information Criteria

# Akaike (AIC) 52.552

# Bayesian (BIC) 62.940

# Sample-Size Adjusted BIC 47.216

# (n\* = (n + 2) / 24)

# MODEL RESULTS

|  | Estimate | S.E. | Est./S.E. | Two-Tailed P-Value |
|--|----------|------|-----------|--------------------|
|--|----------|------|-----------|--------------------|

|                   |       |       |         |         |
|-------------------|-------|-------|---------|---------|
| LAT_AST BY ASTHMA | 1.000 | 0.000 | 999.000 | 999.000 |
|-------------------|-------|-------|---------|---------|

|                |       |       |         |         |
|----------------|-------|-------|---------|---------|
| LAT_LRD BY LRD | 1.000 | 0.000 | 999.000 | 999.000 |
|----------------|-------|-------|---------|---------|

|                      |       |       |       |       |
|----------------------|-------|-------|-------|-------|
| LAT_LRD WITH LAT_AST | 0.056 | 0.021 | 2.704 | 0.007 |
|----------------------|-------|-------|-------|-------|

|                 |         |       |         |         |
|-----------------|---------|-------|---------|---------|
| ASTHMA WITH LRD | 999.000 | 0.000 | 999.000 | 999.000 |
|-----------------|---------|-------|---------|---------|

# Means

|         |       |       |       |       |
|---------|-------|-------|-------|-------|
| LAT_AST | 0.268 | 0.054 | 4.925 | 0.000 |
| LAT_LRD | 0.308 | 0.054 | 5.690 | 0.000 |

# Intercepts

|        |       |       |         |         |
|--------|-------|-------|---------|---------|
| ASTHMA | 0.000 | 0.000 | 999.000 | 999.000 |
| LRD    | 0.000 | 0.000 | 999.000 | 999.000 |

# Variances

|         |       |       |       |       |
|---------|-------|-------|-------|-------|
| LAT_AST | 0.068 | 0.030 | 2.310 | 0.021 |
| LAT_LRD | 0.048 | 0.023 | 2.094 | 0.036 |

# Residual Variances

```

#   ASTHMA           999.000      0.000   999.000   999.000
#   LRD              999.000      0.000   999.000   999.000
#
#
# QUALITY OF NUMERICAL RESULTS
#
#   Condition Number for the Information Matrix           0.571E-05
#   (ratio of smallest to largest eigenvalue)
#
#
#   Beginning Time:  18:31:14
#   Ending Time:    18:31:15
#   Elapsed Time:   00:00:01
#
#
#
# MUTHEN & MUTHEN
# 3463 Stoner Ave.
# Los Angeles, CA 90066
#
# Tel: (310) 391-9971
# Fax: (310) 391-8971
# Web: www.StatModel.com
# Support: Support@StatModel.com
#
# Copyright (c) 1998-2018 Muthen & Muthen
# ***
# [Multivariate random-effects meta-analysis with equality constraints](./Nam03b.inp)
# ***
#
# TITLE:      Multivariate random-effects meta-analysis
#            ! Imposing equality constraints and the means and variances
#
# ! Read the dataset
# DATA: FILE IS Nam03.dat;
#
# ! Variable names in the data
# ! Asthma LRD: effect sizes
# ! Asthma_v Cov_05 LRD_v: known sampling variances and covariance
# VARIABLE: NAMES ID Age Asthma LRD Asthma_v Cov_05 LRD_v;
#
#           ! Missing values are represented by .
#           MISSING ARE .;
#
#           ! Asthma and LRD are used in the analysis.
#           USEVARIABLES ARE Asthma LRD;
#
#           ! These are the known sampling variances and covariance.
#           CONSTRAINT ARE Asthma_v Cov_05 LRD_v;
#
# MODEL:
#           ! Define two latent variables
#           Lat_Ast BY Asthma;

```

```

#       Lat_LRD BY LRD;
#
#       ! Latent means are the same
#       [Lat_Ast*] (1);
#       [Lat_LRD*] (1);
#
#       ! Latent variances are the same
#       Lat_Ast* (2);
#       Lat_LRD* (2);
#
#       ! Means of the observed variables are fixed at 0.
#       [Asthma@0];
#       [LRD@0];
#
#       ! Label the constraints for the known sampling variances
#       ! and covariances
#       Asthma (L1);
#       LRD (L2);
#       Asthma WITH LRD (L3);
#
#       ! Impose the constraints
#       MODEL CONSTRAINT:
#       L1 = Asthma_v;
#       L2 = LRD_v;
#       L3 = Cov_05;
#   ---
#
#
# [Mplus output file](./Nam03b.out)
#   ---
#
# Mplus VERSION 8.2 (Linux)
# MUTHEN & MUTHEN
# 02/06/2019   6:31 PM
#
# INPUT INSTRUCTIONS
#
# TITLE:  Multivariate random-effects meta-analysis
#         ! Imposing equality constraints and the means and variances
#
# ! Read the dataset
# DATA:  FILE IS Nam03.dat;
#
# ! Variable names in the data
# ! Asthma LRD: effect sizes
# ! Asthma_v Cov_05 LRD_v: known sampling variances and covariance
# VARIABLE: NAMES ID Age Asthma LRD Asthma_v Cov_05 LRD_v;
#
#         ! Missing values are represented by .
#         MISSING ARE .;
#
#         ! Asthma and LRD are used in the analysis.
#         USEVARIABLES ARE Asthma LRD;
#

```

```

#           ! These are the known sampling variances and covariance.
#           CONSTRAINT ARE Asthma_v Cov_05 LRD_v;
#
# MODEL:
#           ! Define two latent variables
#           Lat_Ast BY Asthma;
#           Lat_LRD BY LRD;
#
#           ! Latent means are the same
#           [Lat_Ast*] (1);
#           [Lat_LRD*] (1);
#
#           ! Latent variances are the same
#           Lat_Ast* (2);
#           Lat_LRD* (2);
#
#           ! Means of the observed variables are fixed at 0.
#           [Asthma@0];
#           [LRD@0];
#
#           ! Label the constraints for the known sampling variances
#           ! and covariances
#           Asthma (L1);
#           LRD (L2);
#           Asthma WITH LRD (L3);
#
#           ! Impose the constraints
#           MODEL CONSTRAINT:
#           L1 = Asthma_v;
#           L2 = LRD_v;
#           L3 = Cov_05;
#
#
# INPUT READING TERMINATED NORMALLY
#
#
# Multivariate random-effects meta-analysis
#
# SUMMARY OF ANALYSIS
#
# Number of groups                                1
# Number of observations                          59
#
# Number of dependent variables                   2
# Number of independent variables                 0
# Number of continuous latent variables           2
#
# Observed dependent variables
#
# Continuous
#   ASTHMA      LRD
#

```

```

# Continuous latent variables
#   LAT_AST   LAT_LRD
#
#
# Estimator                               ML
# Information matrix                       OBSERVED
# Maximum number of iterations             1000
# Convergence criterion                   0.500D-04
# Maximum number of steepest descent iterations 20
# Maximum number of iterations for H1     2000
# Convergence criterion for H1            0.100D-03
#
# Input data file(s)
#   Nam03.dat
#
# Input data format   FREE
#
# SUMMARY OF DATA
#
#   Number of missing data patterns       3
#
# COVARIANCE COVERAGE OF DATA
#
# Minimum covariance coverage value   0.100
#
#   PROPORTION OF DATA PRESENT
#
#           Covariance Coverage
#           ASTHMA       LRD
#           -----
# ASTHMA       0.542
# LRD          0.136       0.593
#
# UNIVARIATE SAMPLE STATISTICS
#
#   UNIVARIATE HIGHER-ORDER MOMENT DESCRIPTIVE STATISTICS
#
#           Variable/           Mean/           Skewness/           Minimum/ % with           Percentiles
#           Sample Size         Variance         Kurtosis         Maximum Min/Max         20%/60%         40%/80%         Median
#
#   ASTHMA           0.268           -0.038           -0.562           3.12%           -0.041           0.191           0.318
#           32.000           0.122           0.110           1.030           3.12%           0.351           0.470
#   LRD              0.466           1.209           -0.329           2.86%           0.039           0.199           0.285
#           35.000           0.267           0.929           1.933           2.86%           0.419           0.850
#   ASTHMA_V         0.034           3.079           0.000           45.76%          0.000           0.000           0.004
#           59.000           0.004           11.930          0.360           1.69%           0.017           0.053
#   COV_05           0.001           6.762           0.000           86.44%          0.000           0.000           0.000

```



|   |       |        |       |        |       |        |       |       |       |
|---|-------|--------|-------|--------|-------|--------|-------|-------|-------|
| # |       | 59.000 | 0.000 | 46.498 | 0.045 | 1.69%  | 0.000 | 0.000 |       |
| # | LRD_V |        | 0.054 | 5.551  | 0.000 | 40.68% | 0.000 | 0.000 | 0.005 |
| # |       | 59.000 | 0.022 | 34.387 | 1.061 | 1.69%  | 0.012 | 0.053 |       |

# THE MODEL ESTIMATION TERMINATED NORMALLY

# MODEL FIT INFORMATION

# Number of Free Parameters 3

# Loglikelihood

# H0 Value -22.664

# Information Criteria

|                            |        |
|----------------------------|--------|
| # Akaike (AIC)             | 51.327 |
| # Bayesian (BIC)           | 57.560 |
| # Sample-Size Adjusted BIC | 48.126 |

(n\* = (n + 2) / 24)

# MODEL RESULTS

|                | Estimate | S.E.  | Est./S.E. | Two-Tailed P-Value |
|----------------|----------|-------|-----------|--------------------|
| # LAT_AST BY   |          |       |           |                    |
| # ASTHMA       | 1.000    | 0.000 | 999.000   | 999.000            |
| # LAT_LRD BY   |          |       |           |                    |
| # LRD          | 1.000    | 0.000 | 999.000   | 999.000            |
| # LAT_LRD WITH |          |       |           |                    |
| # LAT_AST      | 0.050    | 0.021 | 2.373     | 0.018              |
| # ASTHMA WITH  |          |       |           |                    |
| # LRD          | 999.000  | 0.000 | 999.000   | 999.000            |
| # Means        |          |       |           |                    |
| # LAT_AST      | 0.293    | 0.043 | 6.817     | 0.000              |
| # LAT_LRD      | 0.293    | 0.043 | 6.817     | 0.000              |
| # Intercepts   |          |       |           |                    |
| # ASTHMA       | 0.000    | 0.000 | 999.000   | 999.000            |
| # LRD          | 0.000    | 0.000 | 999.000   | 999.000            |
| # Variances    |          |       |           |                    |
| # LAT_AST      | 0.055    | 0.020 | 2.761     | 0.006              |
| # LAT_LRD      | 0.055    | 0.020 | 2.761     | 0.006              |

```

#
# Residual Variances
#   ASTHMA          999.000      0.000      999.000      999.000
#   LRD             999.000      0.000      999.000      999.000
#
#
# QUALITY OF NUMERICAL RESULTS
#
#   Condition Number for the Information Matrix          0.148E-04
#   (ratio of smallest to largest eigenvalue)
#
#
#   Beginning Time:  18:31:17
#   Ending Time:    18:31:17
#   Elapsed Time:   00:00:00
#
#
#
# MUTHEN & MUTHEN
# 3463 Stoner Ave.
# Los Angeles, CA  90066
#
# Tel: (310) 391-9971
# Fax: (310) 391-8971
# Web: www.StatModel.com
# Support: Support@StatModel.com
#
# Copyright (c) 1998-2018 Muthen & Muthen
# ***
# [Multivariate mixed-effects meta-analysis](./Nam03c.inp)
# ***
#
# TITLE:    Multivariate mixed-effects meta-analysis with age as a moderator
#
# ! Read the dataset
# DATA: FILE IS Nam03.dat;
#
# ! Variable names in the data
# ! Asthma LRD: effect sizes
# ! Asthma_v Cov_05 LRD_v: known sampling variances and covariance
# VARIABLE: NAMES ID Age Asthma LRD Asthma_v Cov_05 LRD_v;
#
#           ! Missing values are represented by .
#           MISSING ARE .;
#
#           ! Asthma and LRD are used in the analysis.
#           ! Age is a moderator.
#           USEVARIABLES ARE Asthma LRD Age;
#
#           ! These are the known sampling variances and covariance.
#           CONSTRAINT ARE Asthma_v Cov_05 LRD_v;
#
#           DEFINE:

```

```

#           ! Center Age before the analysis
#           CENTER Age (GRANDMEAN);
#
# MODEL:
#           ! Define two latent variables
#           Lat_Ast BY Asthma;
#           Lat_LRD BY LRD;
#
#           ! Fix the covariance of between the random effects at 0
#           ! as there is not enough data.
#           Lat_Ast WITH Lat_LRD@0;
#
#           ! Estimate their means
#           [Lat_Ast*];
#           [Lat_LRD*];
#
#           ! Means of the observed variables are fixed at 0.
#           [Asthma@0];
#           [LRD@0];
#
#           ! Label the constraints for the known sampling variances
#           ! and covariances
#           Asthma (L1);
#           LRD (L2);
#           Asthma WITH LRD (L3);
#
#           ! Regress the latent effect sizes on Age
#           Lat_Ast Lat_LRD ON Age;
#
#           ! Estimate the mean of Age
#           [Age*];
#
#           ! Estimate the variance of Age
#           Age*;
#
#           ! Impose the constraints
#           MODEL CONSTRAINT:
#           L1 = Asthma_v;
#           L2 = LRD_v;
#           L3 = Cov_05;
#           ---
#
#           [Mplus output file](./Nam03c.out)
#           ---
#
# Mplus VERSION 8.2 (Linux)
# MUTHEN & MUTHEN
# 02/06/2019   6:31 PM
#
# INPUT INSTRUCTIONS
#
# TITLE:  Multivariate mixed-effects meta-analysis with age as a moderator
#

```

```

# ! Read the dataset
# DATA: FILE IS Nam03.dat;
#
# ! Variable names in the data
# ! Asthma LRD: effect sizes
# ! Asthma_v Cov_05 LRD_v: known sampling variances and covariance
# VARIABLE: NAMES ID Age Asthma LRD Asthma_v Cov_05 LRD_v;
#
# ! Missing values are represented by .
# MISSING ARE .;
#
# ! Asthma and LRD are used in the analysis.
# ! Age is a moderator.
# USEVARIABLES ARE Asthma LRD Age;
#
# ! These are the known sampling variances and covariance.
# CONSTRAINT ARE Asthma_v Cov_05 LRD_v;
#
# DEFINE:
# ! Center Age before the analysis
# CENTER Age (GRANDMEAN);
#
# MODEL:
# ! Define two latent variables
# Lat_Ast BY Asthma;
# Lat_LRD BY LRD;
#
# ! Fix the covariance of between the random effects at 0
# ! as there is not enough data.
# Lat_Ast WITH Lat_LRD@0;
#
# ! Estimate their means
# [Lat_Ast*];
# [Lat_LRD*];
#
# ! Means of the observed variables are fixed at 0.
# [Asthma@0];
# [LRD@0];
#
# ! Label the constraints for the known sampling variances
# ! and covariances
# Asthma (L1);
# LRD (L2);
# Asthma WITH LRD (L3);
#
# ! Regress the latent effect sizes on Age
# Lat_Ast Lat_LRD ON Age;
#
# ! Estimate the mean of Age
# [Age*];
#
# ! Estimate the variance of Age
# Age*;
#

```

```

#           ! Impose the constraints
#           MODEL CONSTRAINT:
#           L1 = Asthma_v;
#           L2 = LRD_v;
#           L3 = Cov_05;
#
#
# INPUT READING TERMINATED NORMALLY
#
#
# Multivariate mixed-effects meta-analysis with age as a moderator
#
# SUMMARY OF ANALYSIS
#
# Number of groups                                1
# Number of observations                          59
#
# Number of dependent variables                   2
# Number of independent variables                 1
# Number of continuous latent variables          2
#
# Observed dependent variables
#
#   Continuous
#   ASTHMA      LRD
#
# Observed independent variables
#   AGE
#
# Continuous latent variables
#   LAT_AST      LAT_LRD
#
# Variables with special functions
#
#   Centering (GRANDMEAN)
#   AGE
#
# Estimator                                        ML
# Information matrix                              OBSERVED
# Maximum number of iterations                    1000
# Convergence criterion                          0.500D-04
# Maximum number of steepest descent iterations   20
# Maximum number of iterations for H1             2000
# Convergence criterion for H1                   0.100D-03
#
# Input data file(s)
#   Nam03.dat
#
# Input data format  FREE
#
#

```

# SUMMARY OF DATA

#  
# Number of missing data patterns 3  
#  
#

# COVARIANCE COVERAGE OF DATA

#  
# Minimum covariance coverage value 0.100  
#

# PROPORTION OF DATA PRESENT

#

|        | Covariance Coverage |       |       |
|--------|---------------------|-------|-------|
|        | ASTHMA              | LRD   | AGE   |
| ASTHMA | 0.542               |       |       |
| LRD    | 0.136               | 0.593 |       |
| AGE    | 0.542               | 0.593 | 1.000 |

#

# UNIVARIATE SAMPLE STATISTICS

# UNIVARIATE HIGHER-ORDER MOMENT DESCRIPTIVE STATISTICS

#

| Variable/<br>Sample Size | Mean/<br>Variance | Skewness/<br>Kurtosis | Minimum/<br>Maximum | % with<br>Min/Max | Percentiles<br>20%/60% | 40%/80% | Median |
|--------------------------|-------------------|-----------------------|---------------------|-------------------|------------------------|---------|--------|
| ASTHMA                   | 0.268             | -0.038                | -0.562              | 3.12%             | -0.041                 | 0.191   | 0.318  |
| 32.000                   | 0.122             | 0.110                 | 1.030               | 3.12%             | 0.351                  | 0.470   |        |
| LRD                      | 0.466             | 1.209                 | -0.329              | 2.86%             | 0.039                  | 0.199   | 0.285  |
| 35.000                   | 0.267             | 0.929                 | 1.933               | 2.86%             | 0.419                  | 0.850   |        |
| AGE                      | 0.000             | -0.106                | -6.403              | 3.39%             | -4.903                 | 0.097   | 1.097  |
| 59.000                   | 15.580            | -0.720                | 9.397               | 1.69%             | 1.697                  | 2.597   |        |
| ASTHMA_V                 | 0.034             | 3.079                 | 0.000               | 45.76%            | 0.000                  | 0.000   | 0.004  |
| 59.000                   | 0.004             | 11.930                | 0.360               | 1.69%             | 0.017                  | 0.053   |        |
| COV_05                   | 0.001             | 6.762                 | 0.000               | 86.44%            | 0.000                  | 0.000   | 0.000  |
| 59.000                   | 0.000             | 46.498                | 0.045               | 1.69%             | 0.000                  | 0.000   |        |
| LRD_V                    | 0.054             | 5.551                 | 0.000               | 40.68%            | 0.000                  | 0.000   | 0.005  |
| 59.000                   | 0.022             | 34.387                | 1.061               | 1.69%             | 0.012                  | 0.053   |        |

#

# THE MODEL ESTIMATION TERMINATED NORMALLY

#  
#  
#  
#  
# MODEL FIT INFORMATION  
#  
# Number of Free Parameters 8

# Loglikelihood

#

```

#           HO Value                -184.142
#
# Information Criteria
#
#           Akaike (AIC)            384.284
#           Bayesian (BIC)          400.904
#           Sample-Size Adjusted BIC 375.747
#           (n* = (n + 2) / 24)
#
#
# MODEL RESULTS
#
#
#           Estimate          S.E.  Est./S.E.  Two-Tailed
#                                           P-Value
#
# LAT_AST BY
#   ASTHMA           1.000      0.000    999.000    999.000
#
# LAT_LRD BY
#   LRD              1.000      0.000    999.000    999.000
#
# LAT_AST ON
#   AGE             -0.038      0.016    -2.444     0.015
#
# LAT_LRD ON
#   AGE             -0.024      0.009    -2.531     0.011
#
# LAT_AST WITH
#   LAT_LRD         0.000      0.000    999.000    999.000
#
# ASTHMA WITH
#   LRD             999.000      0.000    999.000    999.000
#
# Means
#   AGE             0.000      0.514     0.000     1.000
#
# Intercepts
#   ASTHMA          0.000      0.000    999.000    999.000
#   LRD             0.000      0.000    999.000    999.000
#   LAT_AST         0.268      0.049     5.509     0.000
#   LAT_LRD         0.273      0.047     5.753     0.000
#
# Variances
#   AGE             15.580      2.868     5.431     0.000
#
# Residual Variances
#   ASTHMA          999.000      0.000    999.000    999.000
#   LRD             999.000      0.000    999.000    999.000
#   LAT_AST         0.028      0.014     1.967     0.049
#   LAT_LRD         0.030      0.016     1.903     0.057
#
#
# QUALITY OF NUMERICAL RESULTS

```

```

#
# Condition Number for the Information Matrix          0.850E-04
# (ratio of smallest to largest eigenvalue)
#
#
# Beginning Time: 18:31:19
# Ending Time: 18:31:20
# Elapsed Time: 00:00:01
#
#
# MUTHEN & MUTHEN
# 3463 Stoner Ave.
# Los Angeles, CA 90066
#
# Tel: (310) 391-9971
# Fax: (310) 391-8971
# Web: www.StatModel.com
# Support: Support@StatModel.com
#
# Copyright (c) 1998-2018 Muthen & Muthen
#

```

### Three-level meta-analysis

```

# [Three-level random-effects meta-analysis](./Stadler15a.inp)
#
#
# TITLE: Three-level random-effects meta-analysis
#
# ! Read the dataset
# DATA: FILE IS Stadler15.dat;
#
# ! Variable names in the dataset
# ! ID: Level 2 label
# ! Study: Level 3 label
# ! r: effect size (correlation)
# ! v: known sampling variance of r
# ! GenInt: Dummy code for Intelligence Measure (General Intelligence)
# ! Reason: Dummy code for Intelligence Measure (Reasoning)
# VARIABLE: NAMES ID Study r v GenInt Reason;
#
# ! w2 is the square root of v
# USEVARIABLES ARE r w2;
# ! Define level 2 and level 3
# CLUSTER = Study ID;
# ! Define within level (level 2) variables without between (level 3)
# WITHIN = r w2;
#
# ! Transform the effect sizes
# DEFINE: w2 = SQRT(v**(-1));
# r = w2*r;
#

```



```

# ! Use three-level modeling
# ! Activate random slope function
# ANALYSIS: TYPE=THREELEVEL RANDOM;
#     ESTIMATOR = ML;
#
# MODEL:    %WITHIN%
#     ! Mean and variance of the transformed variable are fixed after the transformation
#     [r@0.0];
#     r@1.0;
#
#     ! Define random slope
#     f | r ON w2;
#
#     ! Level 2 variance
#     %BETWEEN ID%
#     f*;
#
#     ! Level 3 variance
#     %BETWEEN Study%
#     f*;
# ---
#
# [Mplus output file](./Stadler15a.out)
# ---
#
# Mplus VERSION 8.2 (Linux)
# MUTHEN & MUTHEN
# 05/27/2019 10:58 AM
#
# INPUT INSTRUCTIONS
#
# TITLE: Three-level random-effects meta-analysis
#
# ! Read the dataset
# DATA: FILE IS Stadler15.dat;
#
# ! Variable names in the dataset
# ! ID: Level 2 label
# ! Study: Level 3 label
# ! r: effect size (correlation)
# ! v: known sampling variance of r
# ! GenInt: Dummy code for Intelligence Measure (General Intelligence)
# ! Reason: Dummy code for Intelligence Measure (Reasoning)
# VARIABLE: NAMES ID Study r v GenInt Reason;
#
#     ! w2 is the square root of v
#     USEVARIABLES ARE r w2;
#     ! Define level 2 and level 3
#     CLUSTER = Study ID;
#     ! Define within level (level 2) variables without between (level 3)
#     WITHIN = r w2;
#
#     ! Transform the effect sizes

```

```

#           DEFINE: w2 = SQRT(v**(-1));
#           r = w2*r;
#
#   ! Use three-level modeling
#   ! Activate random slope function
#   ANALYSIS: TYPE=THREELEVEL RANDOM;
#           ESTIMATOR = ML;
#
#   MODEL: %WITHIN%
#           ! Mean and variance of the transformed variable are fixed after the transformation
#           [r@0.0];
#           r@1.0;
#
#           ! Define random slope
#           f | r ON w2;
#
#           ! Level 2 variance
#           %BETWEEN ID%
#           f*;
#
#           ! Level 3 variance
#           %BETWEEN Study%
#           f*;
#
#
# *** WARNING in MODEL command
#   Variable on the left-hand side of an ON statement in a | statement is a
#   WITHIN variable. The intercept for this variable is not random.
#   Variable: R
#   1 WARNING(S) FOUND IN THE INPUT INSTRUCTIONS
#
#
# Three-level random-effects meta-analysis
#
# SUMMARY OF ANALYSIS
#
# Number of groups                                1
# Number of observations                          60
#
# Number of dependent variables                   1
# Number of independent variables                 1
# Number of continuous latent variables           1
#
# Observed dependent variables
#
#   Continuous
#   R
#
# Observed independent variables
#   W2
#
# Continuous latent variables

```

```

# F
#
# Variables with special functions
#
# Cluster variables      STUDY      ID
#
# Within variables
# R          W2
#
#
# Estimator                                ML
# Information matrix                        OBSERVED
# Maximum number of iterations              100
# Convergence criterion                    0.100D-05
# Maximum number of EM iterations          500
# Convergence criteria for the EM algorithm
# Loglikelihood change                    0.100D-02
# Relative loglikelihood change            0.100D-05
# Derivative                              0.100D-03
# Minimum variance                        0.100D-03
# Maximum number of steepest descent iterations 20
# Maximum number of iterations for H1      2000
# Convergence criterion for H1            0.100D-02
# Optimization algorithm                   EMA
#
# Input data file(s)
# Stadler15.dat
# Input data format FREE
#
#
# SUMMARY OF DATA
#
# Number of ID clusters                    60
# Number of STUDY clusters                 44
#
#
# UNIVARIATE SAMPLE STATISTICS
#
# UNIVARIATE HIGHER-ORDER MOMENT DESCRIPTIVE STATISTICS
#
# Variable/      Mean/      Skewness/      Minimum/ % with      Percentiles
# Sample Size    Variance    Kurtosis    Maximum Min/Max    20%/60%    40%/80%    Median
#
# R              9.555      2.689      -1.234      1.67%      1.425      2.760      3.769
#              60.000      212.394      7.580      72.912      1.67%      5.428      13.103
# W2            17.860      2.504      3.991      1.67%      6.187      8.616      9.714
#              60.000      353.168      6.858      100.071      1.67%      14.408      23.429
#
#
# THE MODEL ESTIMATION TERMINATED NORMALLY
#
#

```

```

#
# MODEL FIT INFORMATION
#
# Number of Free Parameters          3
#
# Loglikelihood
#
#           H0 Value                -148.458
#
# Information Criteria
#
#           Akaike (AIC)             302.915
#           Bayesian (BIC)           309.198
#           Sample-Size Adjusted BIC 299.763
#           (n* = (n + 2) / 24)
#
#
# MODEL RESULTS
#
#           Estimate      S.E.  Est./S.E.  Two-Tailed
#                               P-Value
#
# Within Level
#
#   Intercepts
#     R           0.000      0.000    999.000    999.000
#
#   Residual Variances
#     R           1.000      0.000    999.000    999.000
#
# Between ID Level
#
#   Variances
#     F           0.019      0.011     1.735     0.083
#
# Between STUDY Level
#
#   Means
#     F           0.435      0.032    13.426     0.000
#
#   Variances
#     F           0.021      0.012     1.831     0.067
#
#
# QUALITY OF NUMERICAL RESULTS
#
#           Condition Number for the Information Matrix          0.425E-01
#           (ratio of smallest to largest eigenvalue)
#
#
#           Beginning Time: 10:58:17
#           Ending Time: 10:58:17
#           Elapsed Time: 00:00:00

```

```

#
#
#
# MUTHEN & MUTHEN
# 3463 Stoner Ave.
# Los Angeles, CA 90066
#
# Tel: (310) 391-9971
# Fax: (310) 391-8971
# Web: www.StatModel.com
# Support: Support@StatModel.com
#
# Copyright (c) 1998-2018 Muthen & Muthen
# ```

# [Three-level mixed-effects meta-analysis](./Stadler15b.inp)
# ```
#
# TITLE:      Three-level mixed-effects meta-analysis
#
# ! Read the dataset
# DATA: FILE IS Stadler15.dat;
#
# ! Variable names in the dataset
# ! ID: Level 2 label
# ! Study: Level 3 label
# ! r: effect size (correlation)
# ! v: known sampling variance of r
# ! GenInt: Dummy code for Intelligence Measure (General Intelligence)
# ! Reason: Dummy code for Intelligence Measure (Reasoning)
# VARIABLE: NAMES ID Study r v GenInt Reason;
#
#           ! w2 is the square root of v
#           USEVARIABLES ARE r GenInt Reason w2;
#           ! Define level 2 and level 3
#           CLUSTER = Study ID;
#           WITHIN = r w2;
#           ! Define level 3 variables
#           BETWEEN = (ID) GenInt Reason;
#
#           ! Transform the effect sizes.
#           DEFINE: w2 = SQRT(v**(-1));
#           r = w2*r;
#
# ! Use three-level modeling
# ! Activate random slope function
# ANALYSIS: TYPE=THREELEVEL RANDOM;
#           ESTIMATOR = ML;
#
# MODEL:      %WITHIN%
#           ! Mean and variance of the transformed variable are fixed
#           [r@0.0];
#           r@1.0;
#

```

```

#       ! Define random slope
#       f | r ON w2;
#
#       ! Level 2 variance
#       %BETWEEN ID%
#       f*;
#
#       ! No intercept for the categorical modeator
#       [f@0.0];
#       ! Add the moderators
#       f ON GenInt Reason;
#
#       ! Level 3 variance
#       %BETWEEN Study%
#       f*;
#       ! No intercept for the categorical modeator
#       [f@0.0];
#   ...
#
#   [Mplus output file](./Stadler15b.out)
#   ...
#
# Mplus VERSION 8.2 (Linux)
# MUTHEN & MUTHEN
# 05/27/2019  11:39 AM
#
# INPUT INSTRUCTIONS
#
# TITLE:  Three-level mixed-effects meta-analysis
#
# ! Read the dataset
# DATA:  FILE IS Stadler15.dat;
#
# ! Variable names in the dataset
# ! ID: Level 2 label
# ! Study: Level 3 label
# ! r: effect size (correlation)
# ! v: known sampling variance of r
# ! GenInt: Dummy code for Intelligence Measure (General Intelligence)
# ! Reason: Dummy code for Intelligence Measure (Reasoning)
# VARIABLE: NAMES ID Study r v GenInt Reason;
#
#       ! w2 is the square root of v
#       USEVARIABLES ARE r GenInt Reason w2;
#       ! Define level 2 and level 3
#       CLUSTER = Study ID;
#       WITHIN = r w2;
#       ! Define level 3 variables
#       BETWEEN = (ID) GenInt Reason;
#
#       ! Transform the effect sizes.
#       DEFINE: w2 = SQRT(v**(-1));
#       r = w2*r;

```

```

#
# ! Use three-level modeling
# ! Activate random slope function
# ANALYSIS: TYPE=THREELEVEL RANDOM;
# ESTIMATOR = ML;
#
# MODEL: %WITHIN%
# ! Mean and variance of the transformed variable are fixed
# [r@0.0];
# r@1.0;
#
# ! Define random slope
# f | r ON w2;
#
# ! Level 2 variance
# %BETWEEN ID%
# f*;
#
# ! No intercept for the categorical modeator
# [f@0.0];
# ! Add the moderators
# f ON GenInt Reason;
#
# ! Level 3 variance
# %BETWEEN Study%
# f*;
# ! No intercept for the categorical modeator
# [f@0.0];
#
#
#
# *** WARNING in MODEL command
# Variable on the left-hand side of an ON statement in a | statement is a
# WITHIN variable. The intercept for this variable is not random.
# Variable: R
# 1 WARNING(S) FOUND IN THE INPUT INSTRUCTIONS
#
#
# Three-level mixed-effects meta-analysis
#
# SUMMARY OF ANALYSIS
#
# Number of groups 1
# Number of observations 60
#
# Number of dependent variables 1
# Number of independent variables 3
# Number of continuous latent variables 1
#
# Observed dependent variables
#
# Continuous
# R

```

```

#
# Observed independent variables
#   GENINT      REASON      W2
#
# Continuous latent variables
#   F
#
# Variables with special functions
#
#   Cluster variables      STUDY      ID
#
#   Within variables
#   R      W2
#
#   Level 2 between variables
#   GENINT      REASON
#
#
# Estimator                                ML
# Information matrix                        OBSERVED
# Maximum number of iterations              100
# Convergence criterion                     0.100D-05
# Maximum number of EM iterations           500
# Convergence criteria for the EM algorithm
#   Loglikelihood change                    0.100D-02
#   Relative loglikelihood change            0.100D-05
#   Derivative                              0.100D-03
# Minimum variance                          0.100D-03
# Maximum number of steepest descent iterations 20
# Maximum number of iterations for H1        2000
# Convergence criterion for H1               0.100D-02
# Optimization algorithm                     EMA
#
# Input data file(s)
#   Stadler15.dat
# Input data format FREE
#
#
# SUMMARY OF DATA
#
#   Number of ID clusters                    60
#   Number of STUDY clusters                 44
#
#
# UNIVARIATE SAMPLE STATISTICS
#
#   UNIVARIATE HIGHER-ORDER MOMENT DESCRIPTIVE STATISTICS
#
#   Variable/      Mean/      Skewness/      Minimum/ % with      Percentiles
#   Sample Size    Variance    Kurtosis      Maximum  Min/Max    20%/60%    40%/80%    Median
#
#   R              9.555      2.689        -1.234    1.67%     1.425      2.760      3.769

```



```

#           60.000      212.394      7.580      72.912      1.67%      5.428      13.103
#   GENINT           0.350      0.629      0.000      65.00%      0.000      0.000      0.000
#           60.000      0.227      -1.604      1.000      35.00%      0.000      1.000
#   REASON           0.650      -0.629      0.000      35.00%      0.000      1.000      1.000
#           60.000      0.227      -1.604      1.000      65.00%      1.000      1.000
#    W2             17.860      2.504      3.991      1.67%      6.187      8.616      9.714
#           60.000      353.168      6.858      100.071      1.67%      14.408      23.429
#
#
# THE MODEL ESTIMATION TERMINATED NORMALLY
#
#
# MODEL FIT INFORMATION
#
# Number of Free Parameters              4
#
# Loglikelihood
#
#           H0 Value                    -146.199
#
# Information Criteria
#
#           Akaike (AIC)                 300.398
#           Bayesian (BIC)                308.775
#           Sample-Size Adjusted BIC      296.194
#           (n* = (n + 2) / 24)
#
#
# MODEL RESULTS
#
#
#           Estimate      S.E.  Est./S.E.  Two-Tailed
#                               P-Value
#
# Within Level
#
# Intercepts
#   R           0.000      0.000      999.000      999.000
#
# Residual Variances
#   R           1.000      0.000      999.000      999.000
#
# Between ID Level
#
# F           ON
#   GENINT      0.351      0.050      7.005      0.000
#   REASON      0.484      0.038      12.811      0.000
#
# Intercepts
#   F           0.000      0.000      999.000      999.000
#
# Residual Variances
#   F           0.018      0.010      1.839      0.066

```

```

#
# Between STUDY Level
#
# Means
#   F           0.000      0.000    999.000    999.000
#
# Variances
#   F           0.019      0.010     1.876     0.061
#
#
# QUALITY OF NUMERICAL RESULTS
#
#   Condition Number for the Information Matrix           0.129E-01
#   (ratio of smallest to largest eigenvalue)
#
#
#   Beginning Time:  11:39:29
#   Ending Time:    11:39:29
#   Elapsed Time:   00:00:00
#
#
#
# MUTHEN & MUTHEN
# 3463 Stoner Ave.
# Los Angeles, CA  90066
#
# Tel: (310) 391-9971
# Fax: (310) 391-8971
# Web: www.StatModel.com
# Support: Support@StatModel.com
#
# Copyright (c) 1998-2018 Muthen & Muthen
#

```

```
cat("\n\n")
```

```
## Settings of the computing environment
sessionInfo()
```

```

## R version 3.6.1 (2019-07-05)
## Platform: x86_64-pc-linux-gnu (64-bit)
## Running under: Linux Mint 19.1
##
## Matrix products: default
## BLAS: /usr/lib/x86_64-linux-gnu/openblas/libblas.so.3
## LAPACK: /usr/lib/x86_64-linux-gnu/libopenblas-p-r0.2.20.so
##
## locale:
## [1] LC_CTYPE=en_SG.UTF-8      LC_NUMERIC=C
## [3] LC_TIME=en_SG.UTF-8      LC_COLLATE=en_SG.UTF-8
## [5] LC_MONETARY=en_SG.UTF-8  LC_MESSAGES=en_SG.UTF-8
## [7] LC_PAPER=en_SG.UTF-8     LC_NAME=C
## [9] LC_ADDRESS=C             LC_TELEPHONE=C
## [11] LC_MEASUREMENT=en_SG.UTF-8 LC_IDENTIFICATION=C
##

```

```
## attached base packages:
## [1] stats      graphics  grDevices  utils      datasets  methods   base
##
## other attached packages:
## [1] metafor_2.1-0  Matrix_1.2-17  metaSEM_1.2.2.1  OpenMx_2.13.2
##
## loaded via a namespace (and not attached):
## [1] Rcpp_1.0.1      knitr_1.23      magrittr_1.5     MASS_7.3-51.4
## [5] mnormt_1.5-5    pbivnorm_0.6.0  ellipse_0.4.1    lattice_0.20-38
## [9] stringr_1.4.0   tools_3.6.1     parallel_3.6.1   grid_3.6.1
## [13] nlme_3.1-140    xfun_0.8        htmltools_0.3.6  yaml_2.2.0
## [17] digest_0.6.20   lavaan_0.6-4    evaluate_0.14     rmarkdown_1.13
## [21] stringi_1.4.3   compiler_3.6.1  stats4_3.6.1     mvtnorm_1.0-11
```
